# Supplementary material
Source: publisher site journal article supplement (https://www.dovepress.com/article/236565)
Supplement: Supplementary file 1 [file get_supplementary_file.php]

| **Clinicopathological Variables features** | | **B3GNT3 expression** | | ***P-value*** |
| --- | --- | --- | --- | --- |
| **Low expression High expression**  **(n=54) (n=66)** | |
| Age (years) | ≤65 | 24 | 38 | 0.152 |
| >65 | 30 | 28 |  |
| Gender | Male | 33 | 39 | 0.822 |
| Female | 21 | 27 |  |
| Smoking history | Smokers | 35 | 32 | 0.47 |
|  | Never smokers | 29 | 34 |  |
| Histologic subtype | Squamous cell carcinoma | 28 | 39 | 0.426 |
|  | Adenocarcinoma | 26 | 27 |  |
| TNM stage | Stage I | 28 | 13 | **0.024** |
| Stage II | 16 | 19 |  |
|  | Stage III | 10 | 34 |  |
| Tumor size(cm) | ≤2.5 | 24 | 16 | **0.019** |
| >2.5 | 30 | 50 |  |
| Distant metastasis | Absent | 27 | 17 | **0.006** |
|  | Present | 27 | 49 |  |

**Supplementary Table 1. The relationship between B3GNT3 expression and clinicopathological features of lung cancer TMA cohort**

**Supplementary Table 2. Synthetic oligonucleotides used in this study**

| **siRNA** | **sense sequence** |
| --- | --- |
| miR-149-5p mimics | 5'- CCCUCACUUCUGUGCCUCGGUCU -3' |
| miR-149-5p mimics negative  control | 5’- UUCUCCGAACGUGUCACGUUU-3' |
| miR-149-5p inhibitor | 5'- AGACCGAGGCACAGAAGTGAGGG -3' |
| miR-149-5p inhibitor negative control | 5'-TCTACTCTTTCTAGGAGGTTGTGA-3' |
